# Supplementary material for: Body composition and risk factors for cardiovascular disease in global multi-ethnic populations
Source: PubMed Central journal article supplement (PMC10439008; doi:10.1038/s41366-023-01339-9), 2023-07-17

# SUPPLEMENTAL MATERIAL

## Body composition and risk factors for cardiovascular disease in global multi-ethnic populations

### Contents

|                                                                                                                                                               |    |
|---------------------------------------------------------------------------------------------------------------------------------------------------------------|----|
| Body composition and risk factors for cardiovascular disease in global multi-ethnic populations .....                                                         | 1  |
| Supplemental Table 1. Characteristics of the subsample of The Malaysia Cohort with HbA1c measurements available (N=12,031; 18.1%) .....                       | 2  |
| Supplemental Table 2. Fully adjusted associations with risk factors for cardiovascular disease for a 1 SD increase in waist (cm)-to-height (cm) ratio.....    | 3  |
| Supplemental Figure e1. Flow diagram of exclusions made to analytic samples of The Malaysia Cohort and UK Biobank.....                                        | 4  |
| Supplemental Figure e2. Associations between body mass index (BMI) quintiles (adjusted for age) and cardiovascular risk factors across ethnicities.....       | 5  |
| Supplemental Figure e3. Associations between fat mass quintiles (adjusted for age) and cardiovascular risk factors across ethnicities.....                    | 6  |
| Supplemental Figure e4. Associations between lean mass quintiles (adjusted for age) and cardiovascular risk factors across ethnicities.....                   | 7  |
| Supplemental Figure e5. Associations between waist circumference quintiles (adjusted for age) and cardiovascular risk factors across ethnicities.....         | 8  |
| Supplemental Figure e6. Fully adjusted associations between cardiovascular risk factors a 1 sex- and ethnic- specific SD change in body mass index (BMI)..... | 9  |
| Supplemental Figure e7. Fully adjusted associations between cardiovascular risk factors a 1 sex- and ethnic- specific SD change in fat mass. ....             | 10 |
| Supplemental Figure e8. Fully adjusted associations between cardiovascular risk factors a 1 sex- and ethnic- specific SD change in lean mass.....             | 11 |
| Supplemental Figure e9. Fully adjusted associations between cardiovascular risk factors a 1 sex- and ethnic- specific SD change in waist circumference. ....  | 12 |

**Supplemental Table 1. Characteristics of the subsample of The Malaysia Cohort with HbA1c measurements available (N=12,031; 18.1%), and the UK Biobank sample with measurements available (N=413,737).**

|                                    | <b>MEN</b>                   |                            |                              |                           |
|------------------------------------|------------------------------|----------------------------|------------------------------|---------------------------|
|                                    | <b>White<br/>(n=184,433)</b> | <b>Malay<br/>(N=2,323)</b> | <b>Chinese<br/>(N=1,908)</b> | <b>Indian<br/>(N=716)</b> |
| Age, years                         | 56.4 (8.1)                   | 50.4 (6.9)                 | 52.5 (7.1)                   | 51.3 (6.8)                |
| <i>Body composition</i>            |                              |                            |                              |                           |
| Weight, kg                         | 86.2 (14.1)                  | 72.4 (11.3)                | 69.8 (10.6)                  | 74.9 (12.0)               |
| Height, cm                         | 176.0 (6.7)                  | 166.1 (5.8)                | 168.5 (5.7)                  | 168.8 (6.3)               |
| Body mass index, kg/m <sup>2</sup> | 27.8 (4.2)                   | 26.2 (3.8)                 | 24.6 (3.4)                   | 26.3 (4.1)                |
| Total fat mass, kg                 | 22.2 (8.2)                   | 21.1 (7.4)                 | 18.6 (6.7)                   | 23.1 (8.1)                |
| Lean mass, kg                      | 28.8 (4.0)                   | 28.6 (3.5)                 | 28.5 (3.5)                   | 28.9 (3.6)                |
| Waist circumference, cm            | 96.8 (11.1)                  | 88.3 (10.1)                | 86.4 (9.4)                   | 92.7 (10.8)               |
| <i>Cardiovascular risk factors</i> |                              |                            |                              |                           |
| SBP, mmHg                          | 141 (17)                     | 132.9 (18.5)               | 133.7 (17.9)                 | 132.2 (17.7)              |
| LDL cholesterol, mmol/L            | 3.5 (0.8)                    | 4.0 (1.0)                  | 3.5 (0.9)                    | 3.7 (1.0)                 |
| Triglycerides, mmol/L              | 2.0 (1.2)                    | 1.8 (1.2)                  | 1.7 (1.4)                    | 1.7 (1.0)                 |
| HbA1c, % *                         | 5.4 (0.6)                    | 5.9 (1.2)                  | 5.8 (1.0)                    | 6.2 (1.3)                 |
| <i>Lifestyle (n, %)</i>            |                              |                            |                              |                           |
| Current drinkers                   | 175,785 (95.3)               | 30 (1.3)                   | 321 (16.8)                   | 93 (13.0)                 |
| Current smokers                    | 21,727 (11.8)                | 813 (35.0)                 | 481 (25.2)                   | 168 (23.5)                |
| Moderate physical activity         | 85,042 (46.1)                | 980 (42.2)                 | 848 (44.4)                   | 303 (42.3)                |
| Tertiary education                 | 108,146 (58.6)               | 731 (31.5)                 | 545 (28.6)                   | 205 (28.6)                |
|                                    | <b>WOMEN</b>                 |                            |                              |                           |
|                                    | <b>White<br/>(n=229,304)</b> | <b>Malay<br/>(n=2,839)</b> | <b>Chinese<br/>(n=3,335)</b> | <b>Indian<br/>(n=910)</b> |
| Age, years                         | 56.3 (8.0)                   | 49.5 (6.3)                 | 51.6 (6.8)                   | 50.0 (6.5)                |
| <i>Body composition</i>            |                              |                            |                              |                           |
| Weight, kg                         | 71.3 (13.8)                  | 64.8 (11.3)                | 57.8 (9.8)                   | 66.0 (11.5)               |
| Height, cm                         | 162.7 (6.2)                  | 154.3 (5.5)                | 156.7 (5.5)                  | 155.5 (5.7)               |
| Body mass index, kg/m <sup>2</sup> | 27.0 (5.1)                   | 27.2 (4.4)                 | 23.5 (3.8)                   | 27.3 (4.5)                |
| Total fat mass, kg                 | 26.8 (9.9)                   | 26.9 (7.9)                 | 20.7 (6.7)                   | 28.3 (8.2)                |
| Lean mass, kg                      | 19.5 (2.5)                   | 20.31 (2.9)                | 19.8 (2.7)                   | 20.2 (2.9)                |
| Waist circumference, cm            | 84.3 (12.4)                  | 83.9 (11.0)                | 78.4 (9.7)                   | 86.9 (10.7)               |
| <i>Cardiovascular risk factors</i> |                              |                            |                              |                           |
| SBP, mmHg                          | 135 (19)                     | 130.8 (20.6)               | 129.5 (20.3)                 | 129.3 (19.7)              |
| LDL cholesterol, mmol/L            | 3.7 (0.9)                    | 3.8 (1.0)                  | 3.5 (0.9)                    | 3.6 (0.9)                 |
| Triglycerides, mmol/L              | 1.5 (0.9)                    | 1.3 (0.7)                  | 1.2 (0.7)                    | 1.3 (0.8)                 |
| HbA1c, % *                         | 5.4 (0.5)                    | 5.8 (1.1)                  | 5.6 (0.7)                    | 6.0 (1.3)                 |
| <i>Lifestyle (n, %)</i>            |                              |                            |                              |                           |
| Current drinkers                   | 211,610 (92.3)               | 6 (0.2)                    | 113 (3.4)                    | 7 (0.8)                   |
| Current smokers                    | 19,611 (8.6)                 | 23 (0.8)                   | 87 (2.6)                     | 4 (0.4)                   |
| Moderate physical activity         | 109,023 (47.6)               | 1,390 (49.0)               | 1,793 (53.8)                 | 430 (47.3)                |
| Tertiary education                 | 122,936 (53.6)               | 818 (28.8)                 | 762 (22.9)                   | 158 (17.4)                |

**Supplemental Table 2. Fully adjusted associations with risk factors for cardiovascular disease for a 1 SD increase in waist (cm)-to-height (cm) ratio. <sup>a</sup>**

| MEN   |         | Standard Deviation | SBP, mmHg         | LDL, mmol/L        | TRIGLYCERIDES, mmol/L | HbA1c, %          |
|-------|---------|--------------------|-------------------|--------------------|-----------------------|-------------------|
|       | Chinese | 0.06               | 3.63 (3.25, 4.01) | 0.07 (0.05, 0.09)  | 0.28 (0.25, 0.30)     | 0.05 (0.04, 0.06) |
|       | Malay   | 0.06               | 4.07 (3.74, 4.39) | 0.04 (0.02, 0.06)  | 0.28 (0.26, 0.30)     | 0.06 (0.05, 0.08) |
|       | Indian  | 0.06               | 2.95 (2.43, 3.48) | 0.05 (0.02, 0.08)  | 0.08 (0.05, 0.12)     | 0.04 (0.02, 0.07) |
|       | White   | 0.06               | 2.74 (2.66, 2.82) | 0.00 (-0.01, 0.00) | 0.32 (0.32, 0.33)     | 0.14 (0.14, 0.15) |
|       |         |                    |                   |                    |                       |                   |
| WOMEN |         |                    |                   |                    |                       |                   |
|       | Chinese | 0.06               | 3.59 (3.27, 3.91) | 0.14 (0.12, 0.16)  | 0.21 (0.19, 0.22)     | 0.03 (0.02, 0.03) |
|       | Malay   | 0.07               | 3.41 (3.08, 3.74) | 0.07 (0.05, 0.08)  | 0.18 (0.16, 0.20)     | 0.04 (0.03, 0.05) |
|       | Indian  | 0.07               | 2.34 (1.84, 2.85) | 0.03 (0.00, 0.05)  | 0.10 (0.08, 0.13)     | 0.07 (0.05, 0.09) |
|       | White   | 0.08               | 3.51 (3.43, 3.58) | 0.08 (0.08, 0.08)  | 0.31 (0.30, 0.31)     | 0.12 (0.12, 0.12) |

<sup>a</sup> Adjusted for age, education, smoking, alcohol and physical activity. SBP= Systolic blood pressure; LDL=Low density lipoprotein; HbA1c=glycated haemoglobin.

**Supplemental Figure e1. Flow diagram of exclusions made to analytic samples of The Malaysia Cohort and UK Biobank.**

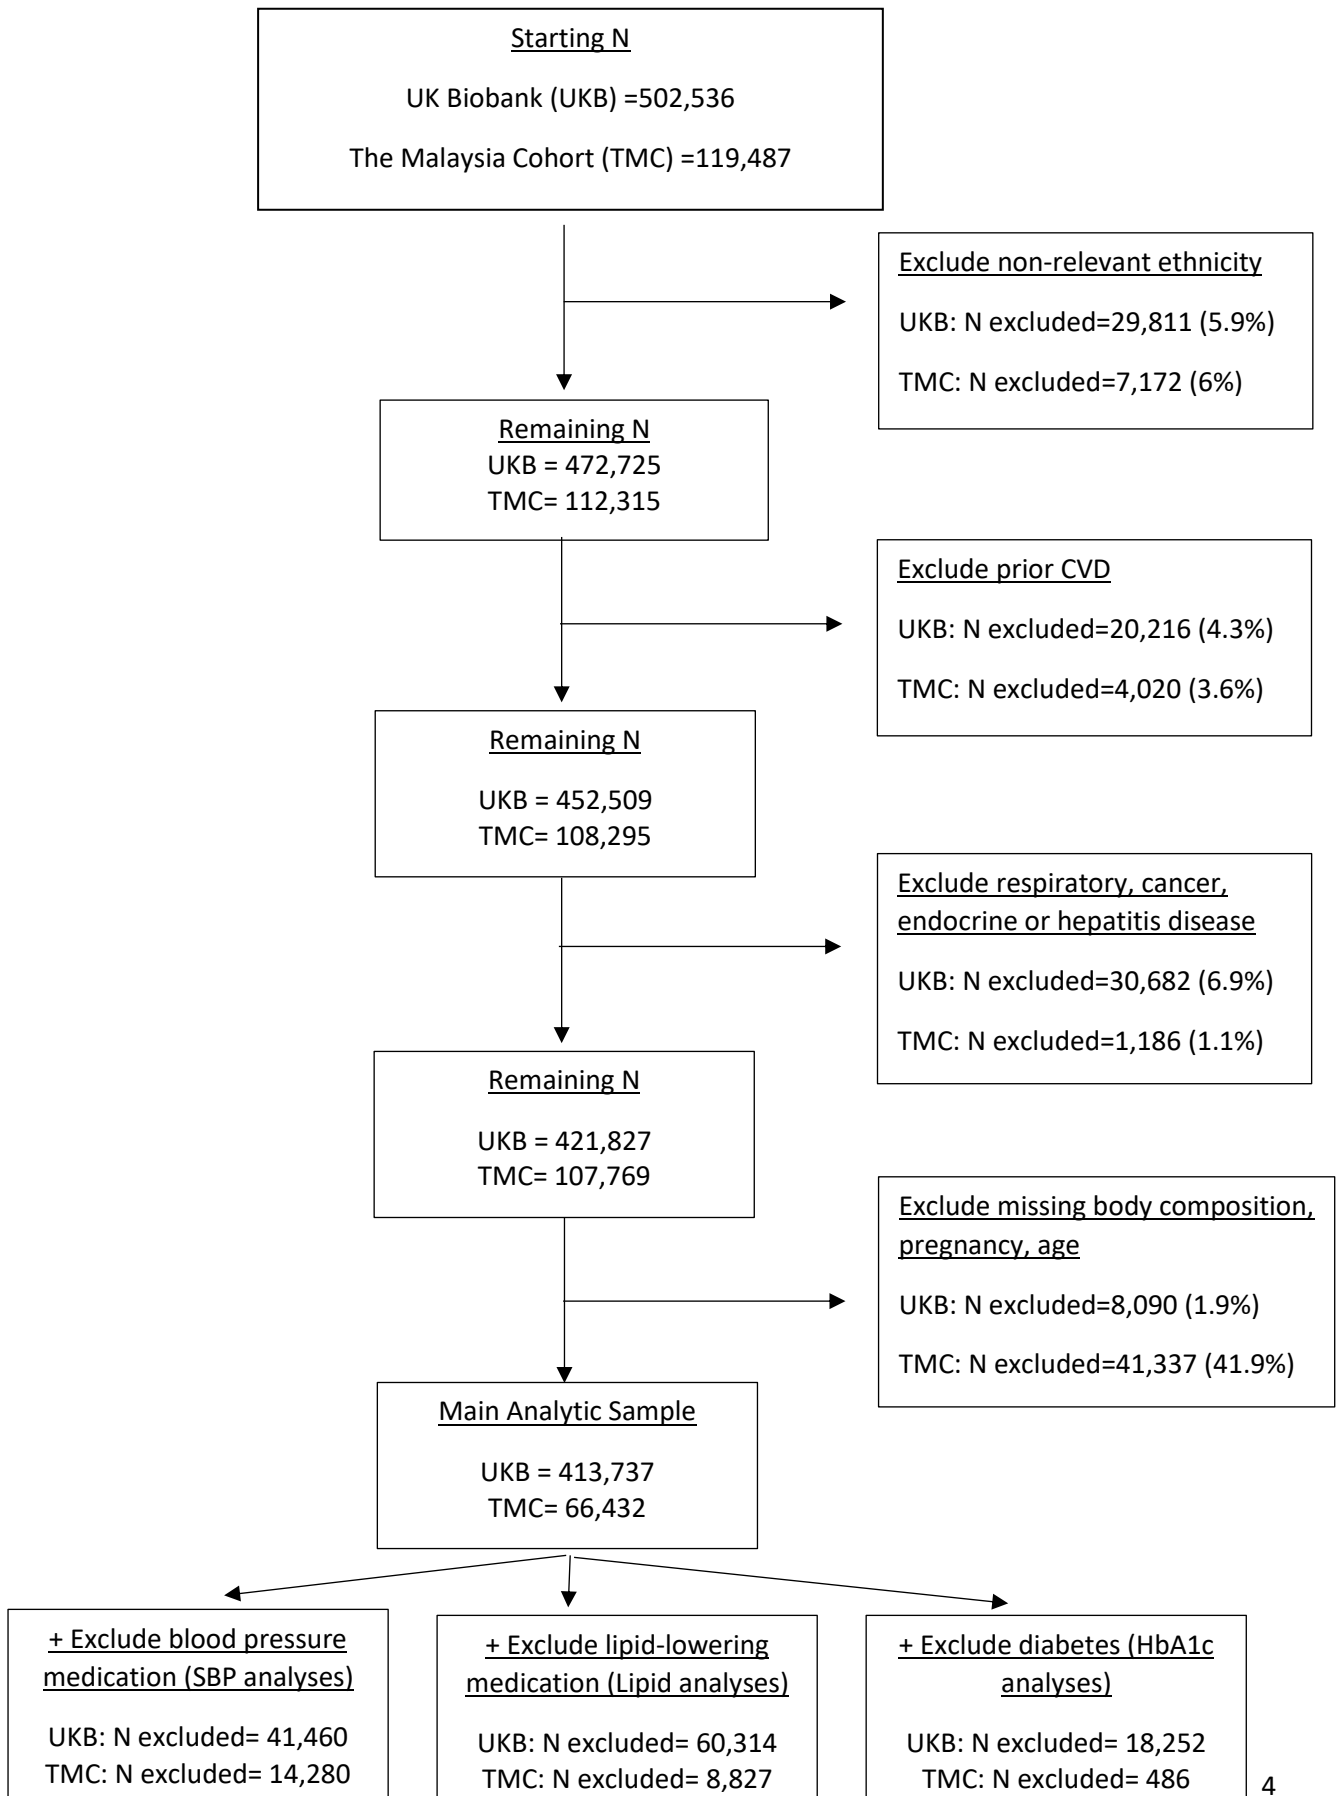

Supplemental Figure e2. Associations between body mass index (BMI) quintiles (adjusted for age) and cardiovascular risk factors across ethnicities.

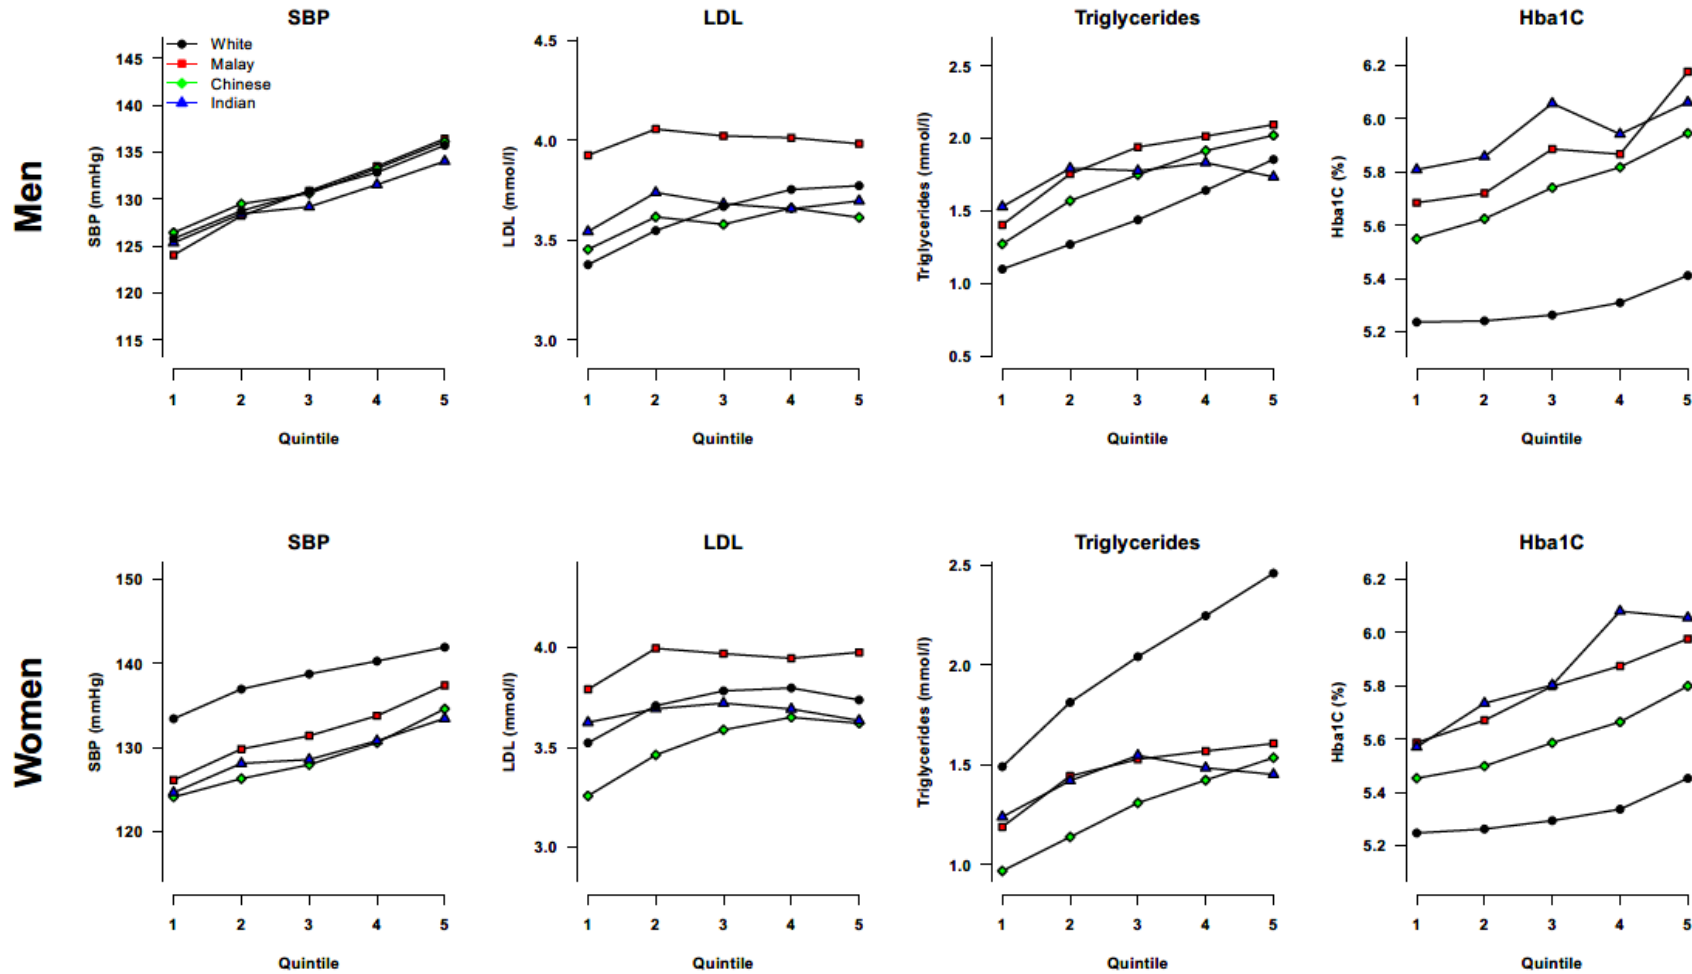

Supplemental Figure e3. Associations between fat mass quintiles (adjusted for age) and cardiovascular risk factors across ethnicities.

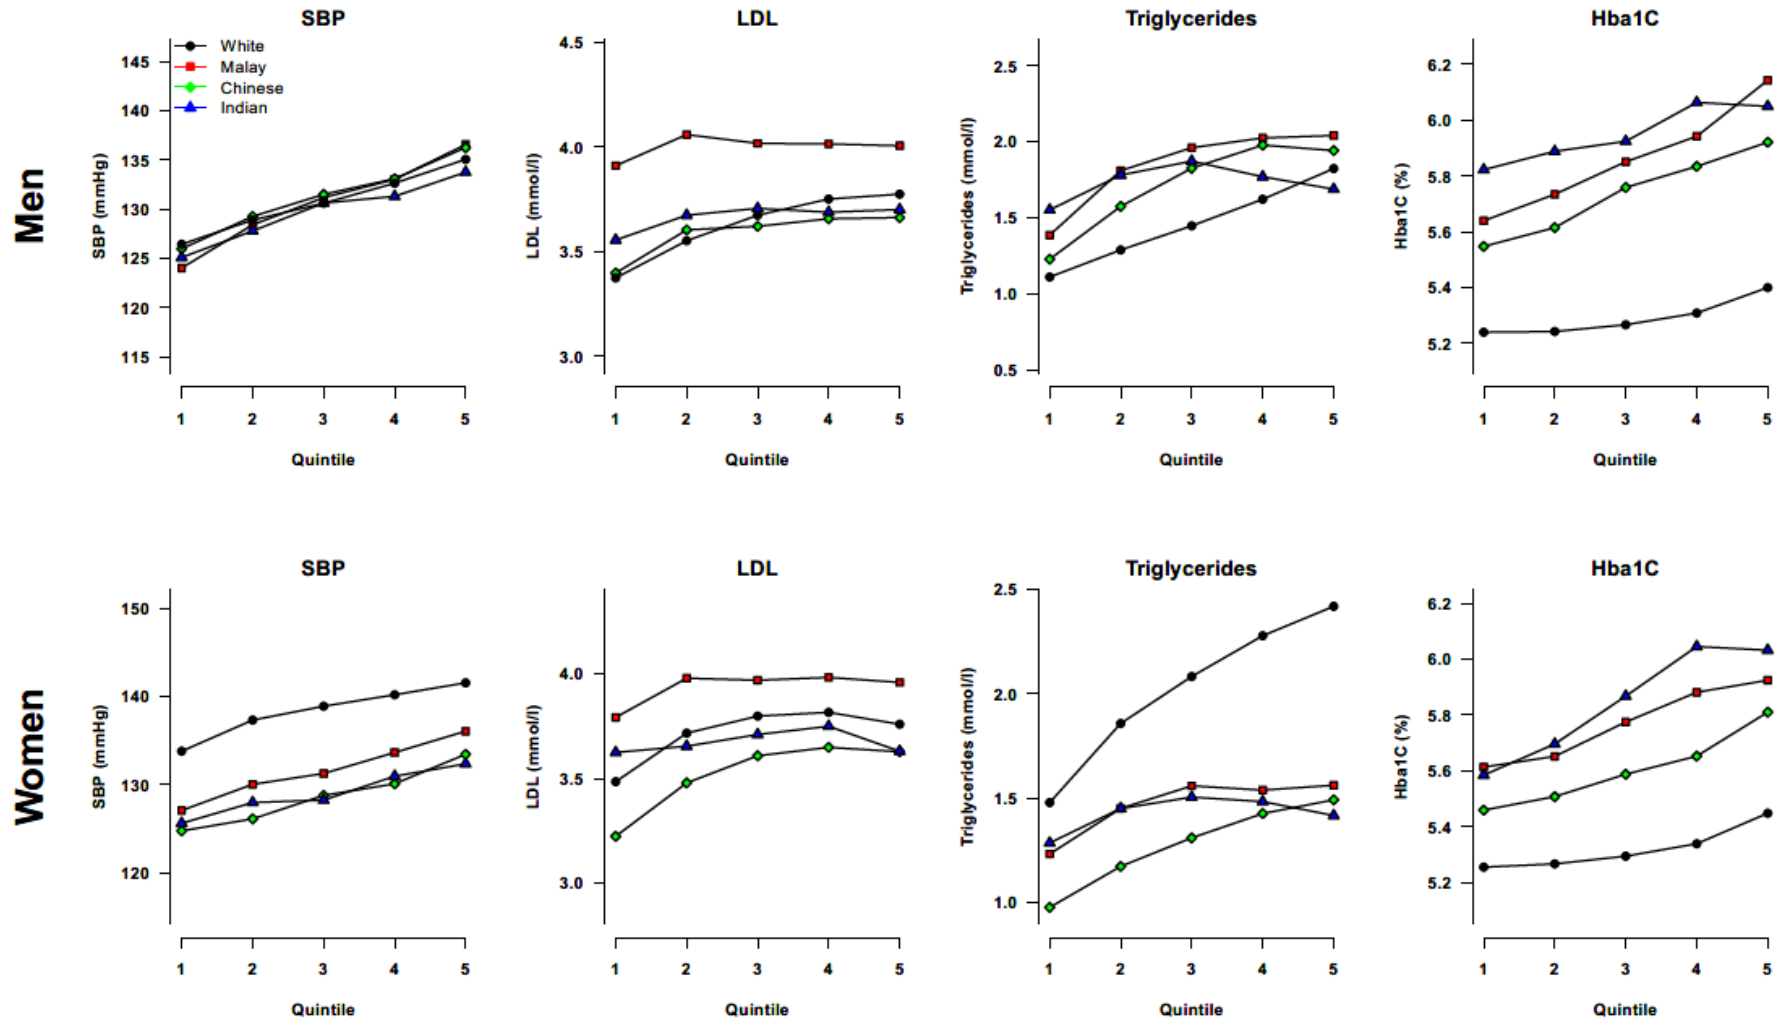

Supplemental Figure e4. Associations between lean mass quintiles (adjusted for age) and cardiovascular risk factors across ethnicities.

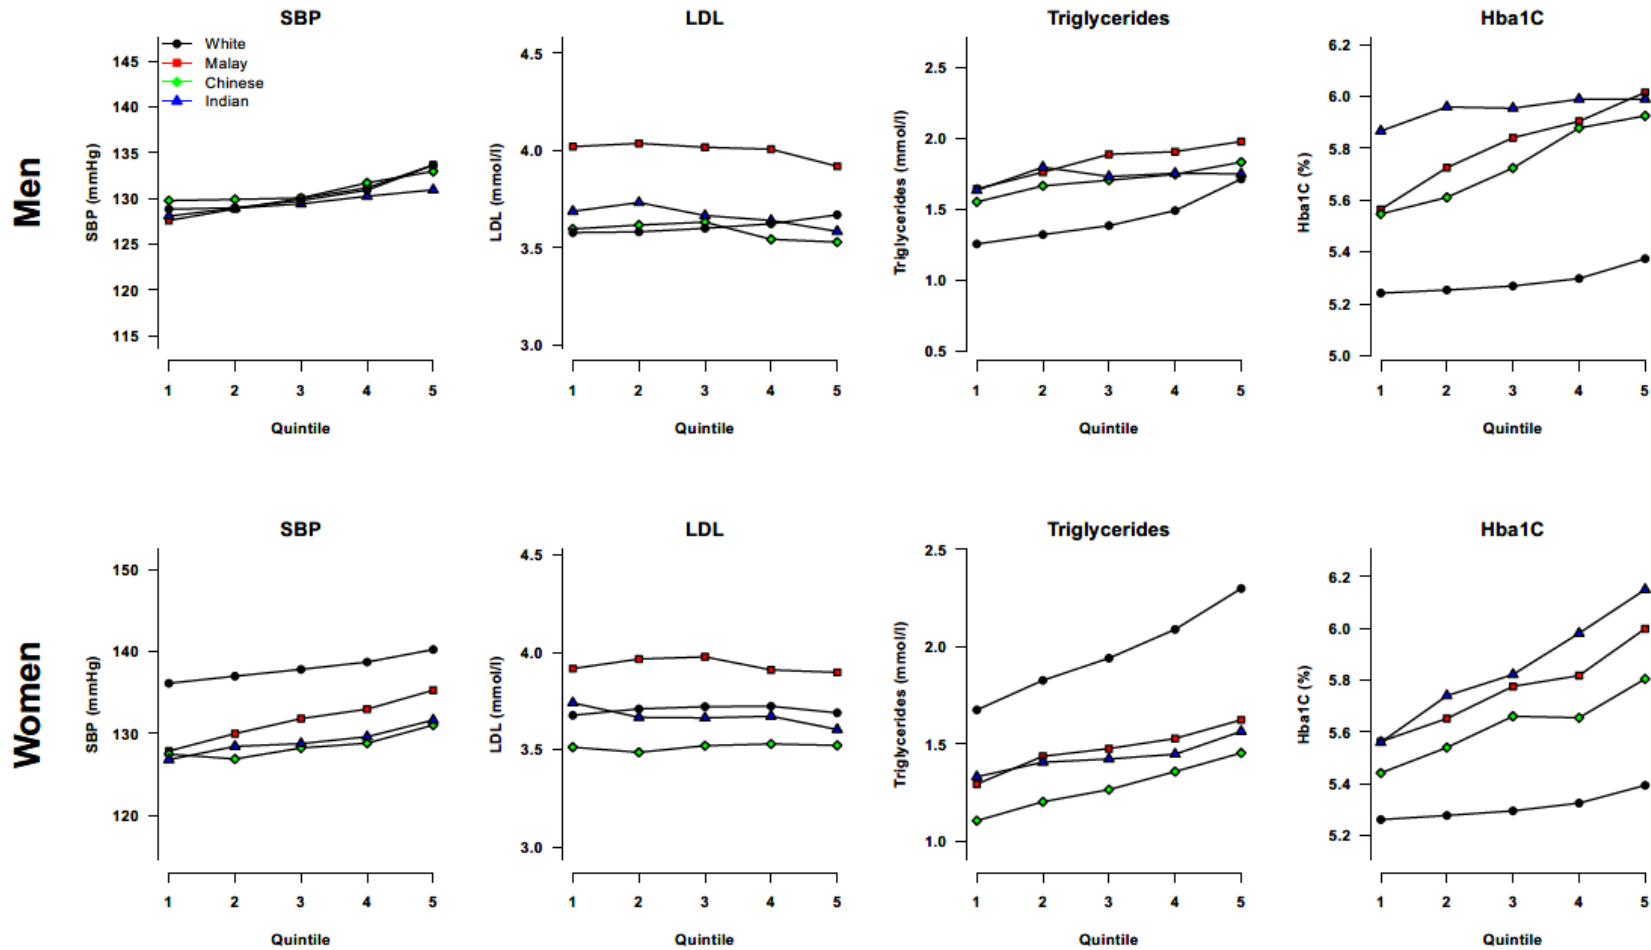

Supplemental Figure e5. Associations between waist circumference quintiles (adjusted for age) and cardiovascular risk factors across ethnicities.

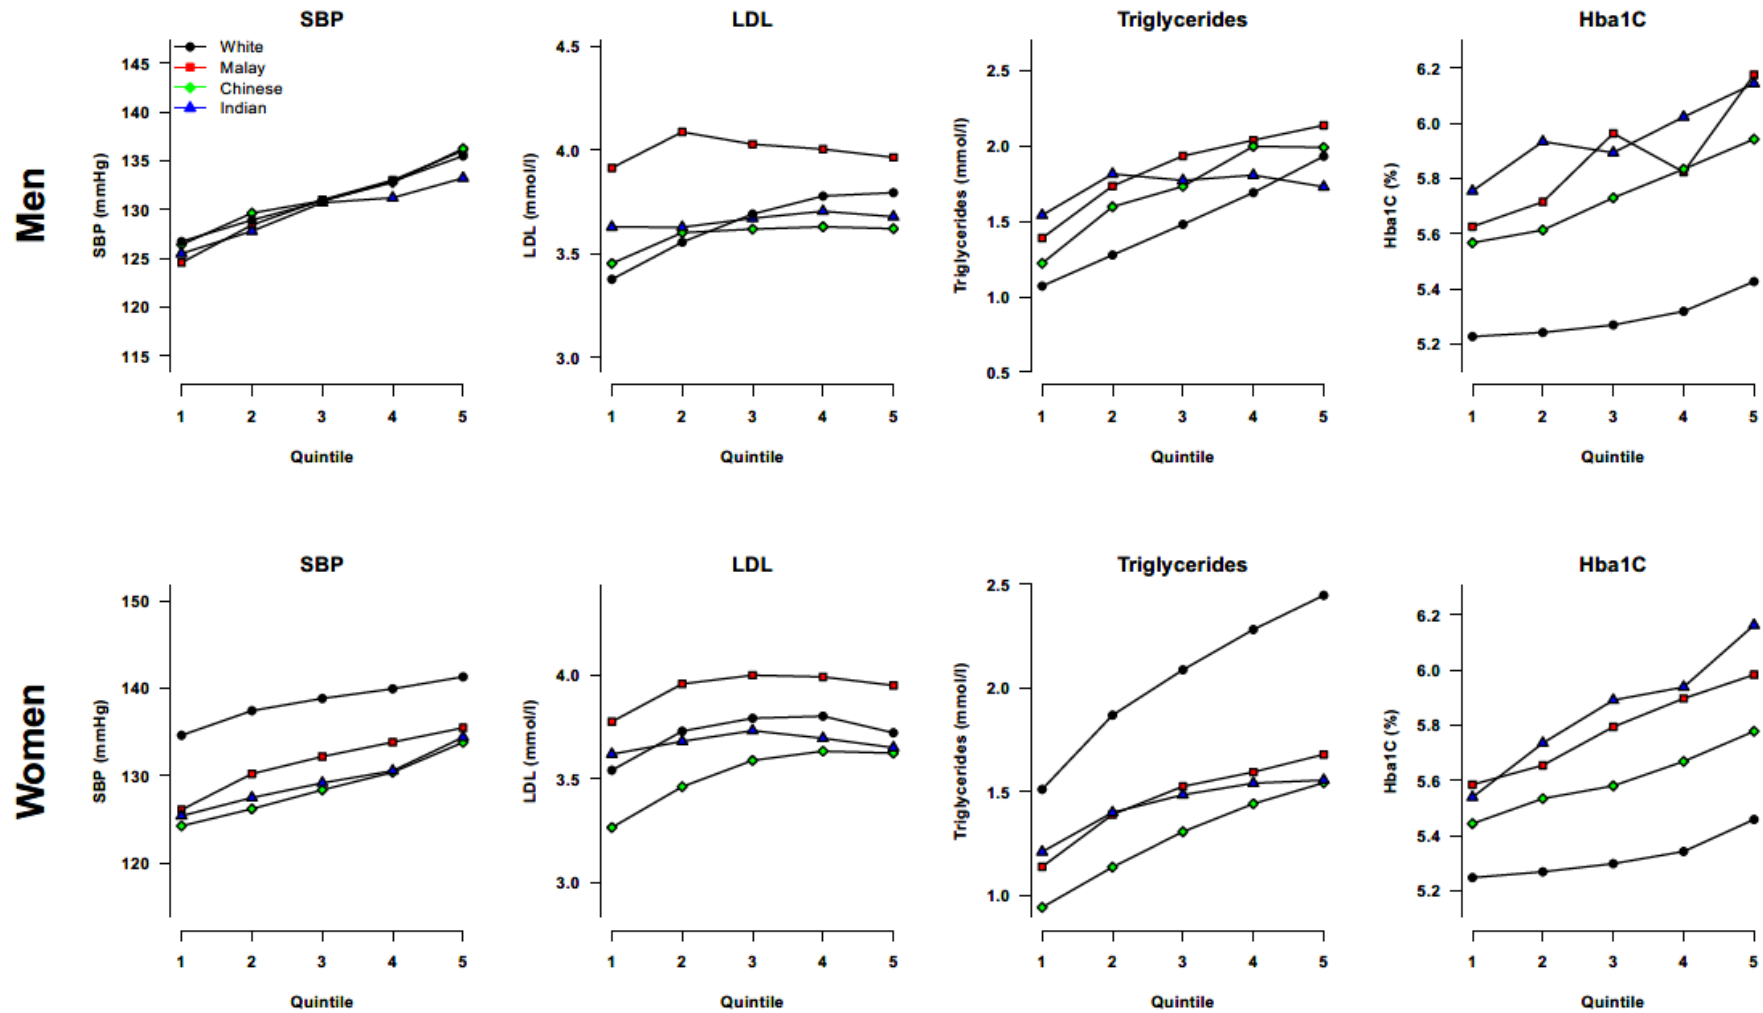



Supplemental Figure e6. Fully adjusted associations between cardiovascular risk factors a 1 sex- and ethnic- specific SD change in body mass index (BMI).

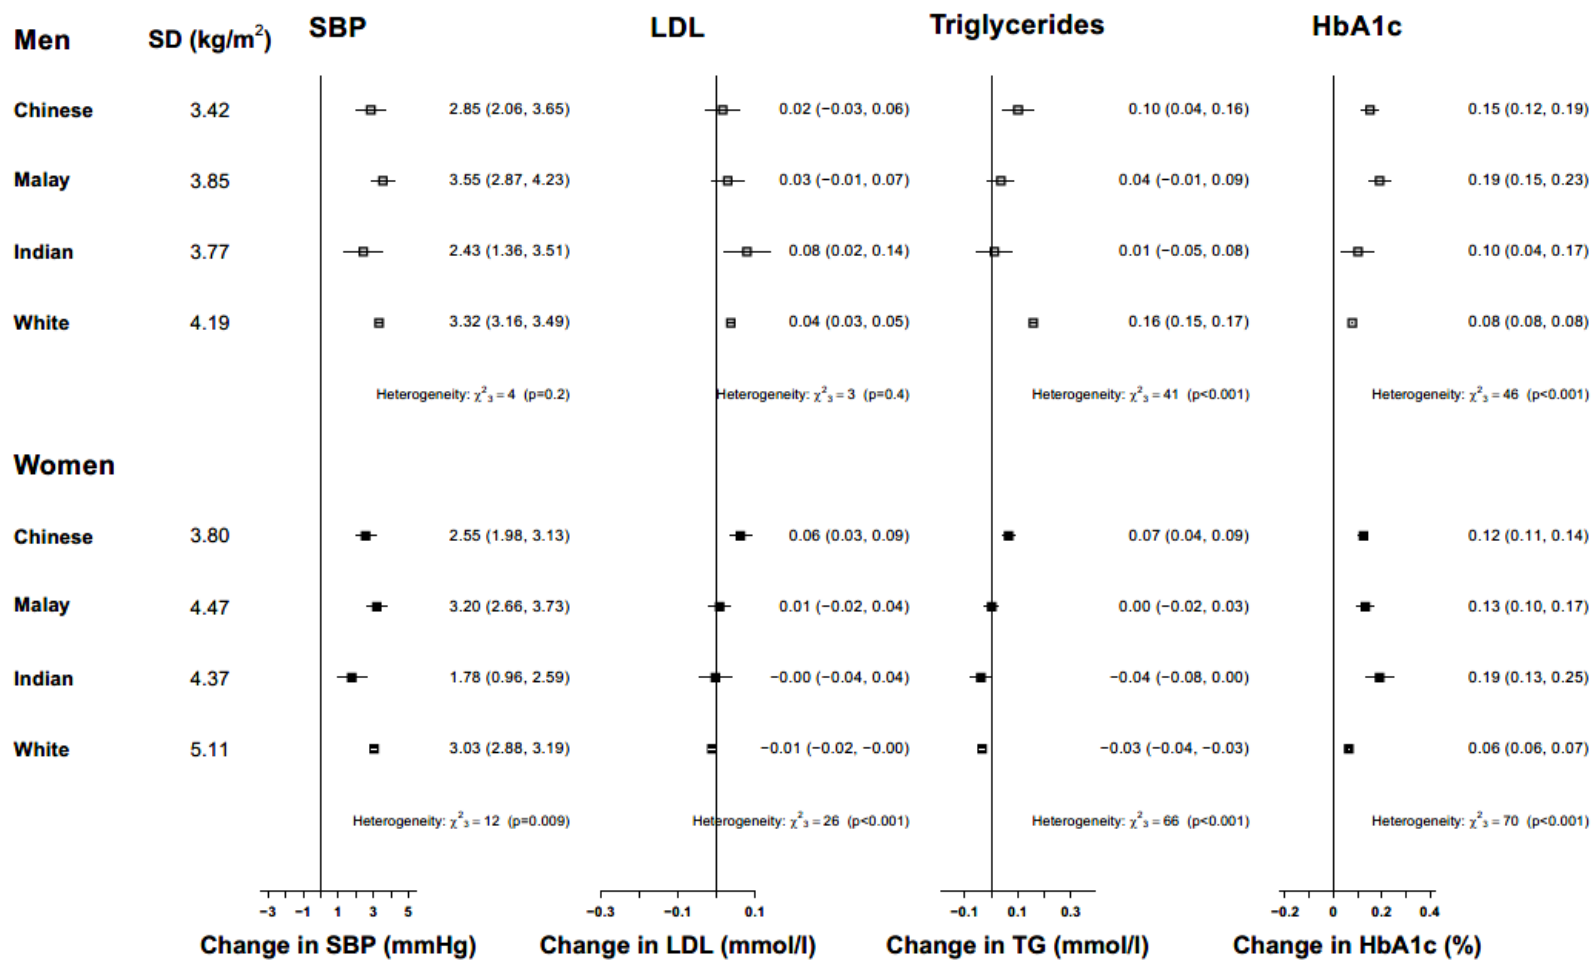

Supplemental Figure e7. Fully adjusted associations between cardiovascular risk factors a 1 sex- and ethnic- specific SD change in fat mass.

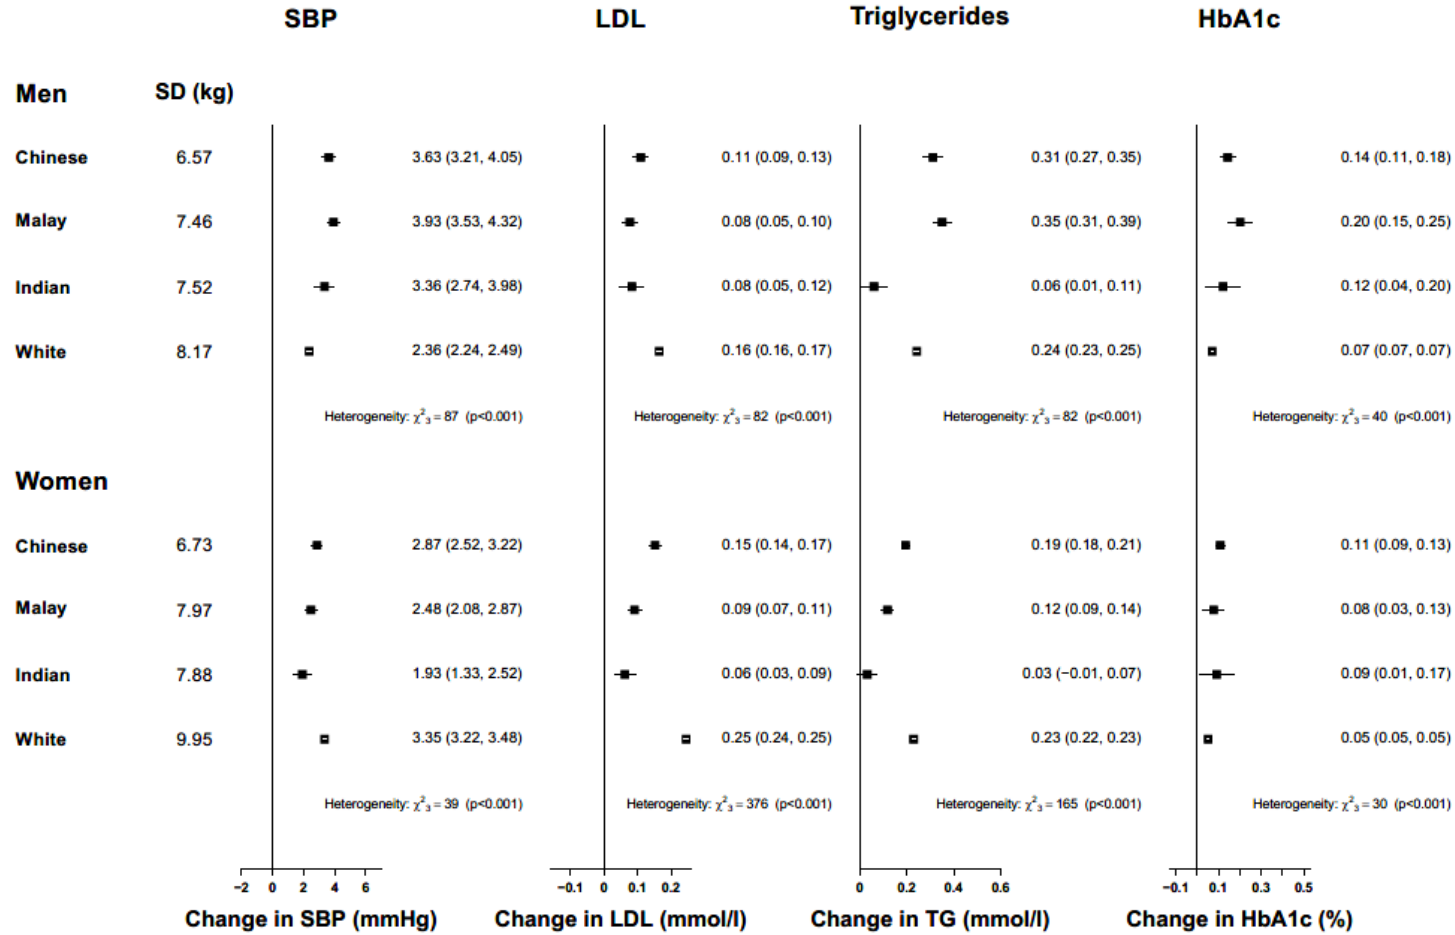

Supplemental Figure e8. Fully adjusted associations between cardiovascular risk factors a 1 sex- and ethnic- specific SD change in lean mass.

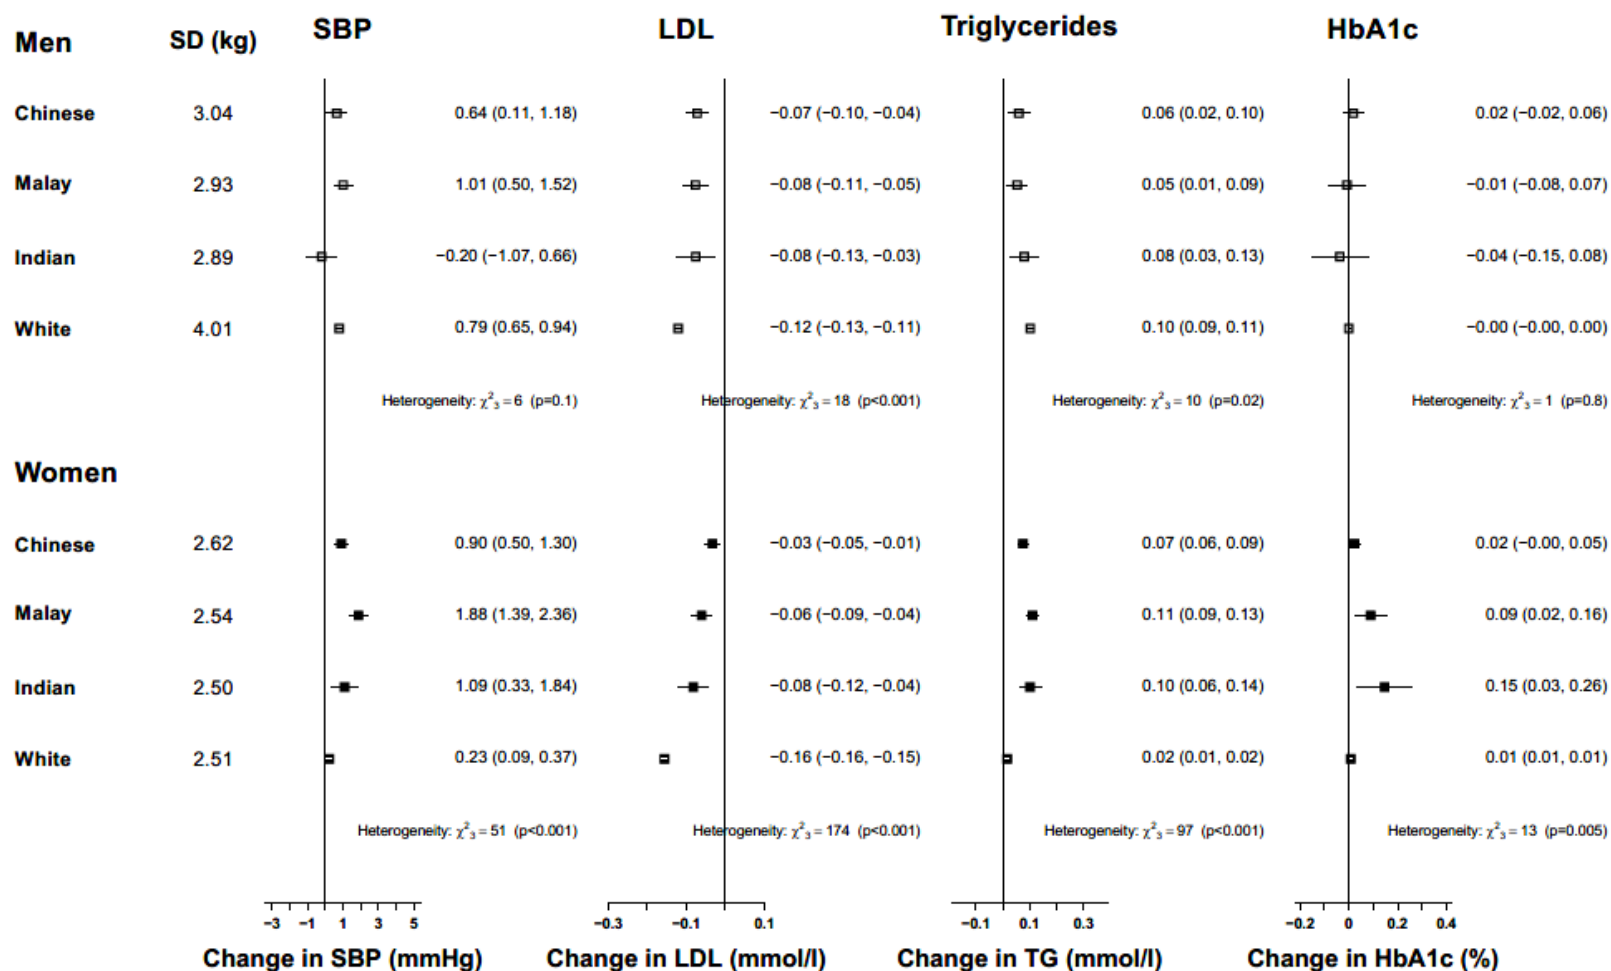

Supplemental Figure e9. Fully adjusted associations between cardiovascular risk factors a 1 sex- and ethnic- specific SD change in waist circumference.

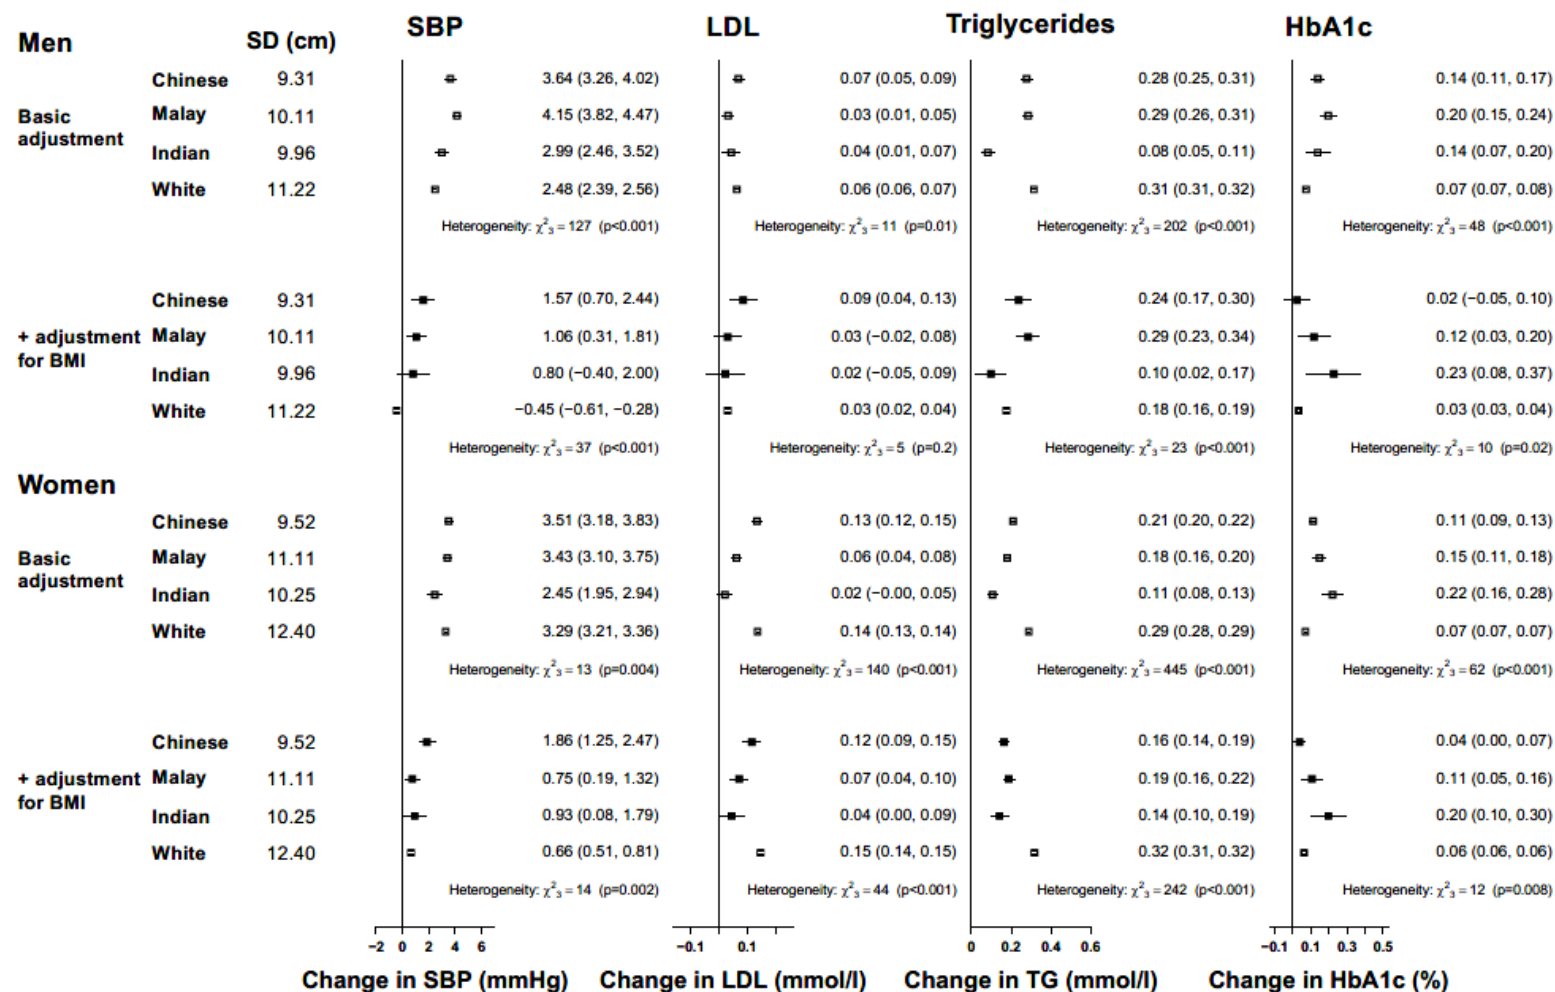

Supplement: 41366_2023_1339_MOESM1_ESM.pdf [file 41366_2023_1339_MOESM1_ESM.pdf]
